# Supplementary material for: Global Incidence and Prevalence of Gaucher Disease: A Targeted Literature Review
Source: MDPI journal article supplement (doi:10.3390/jcm12010085), 2022-12-22
Supplement: s1 [file s1]

# Supplementary material

Supplemental Table S1. GD prevalence: Europe.

|                            | Study Design         | Study Period      | Reference Population                                         | Prevalence                                                                                                                     |
|----------------------------|----------------------|-------------------|--------------------------------------------------------------|--------------------------------------------------------------------------------------------------------------------------------|
| Finland                    |                      |                   |                                                              |                                                                                                                                |
| Žnidar et al. 2014 [20]    | Cross-sectional      | Jun 2012–Apr 2013 | Finnish population in 2013                                   | GD (unspecified)<br>0.18/100,000 inhabitants*                                                                                  |
| Austria                    |                      |                   |                                                              |                                                                                                                                |
| Žnidar et al. 2014 [20]    | Cross-sectional      | Jun 2012–Apr 2013 | Austrian population in 2013                                  | GD (unspecified)<br>0.24/100,000 inhabitants*                                                                                  |
| Lithuania                  |                      |                   |                                                              |                                                                                                                                |
| Žnidar et al. 2014 [20]    | Cross-sectional      | Jun 2012–Apr 2013 | Lithuanian population in 2013                                | GD (unspecified)<br>0.27/100,000 inhabitants*                                                                                  |
| Denmark                    |                      |                   |                                                              |                                                                                                                                |
| Žnidar et al. 2014 [20]    | Cross-sectional      | Jun 2012–Apr 2013 | Danish population in 2013                                    | GD (unspecified)<br>0.3/100,000 inhabitants*                                                                                   |
| Estonia                    |                      |                   |                                                              |                                                                                                                                |
| Žnidar et al. 2014 [20]    | Cross-sectional      | Jun 2012–Apr 2013 | Estonian population in 2013                                  | GD (unspecified)<br>0.3/100,000 inhabitants*                                                                                   |
| Russia                     |                      |                   |                                                              |                                                                                                                                |
| Movsisyan et al. 2017 [45] | Retrospective cohort | 2006–2016         | Population <18 years of age in Russia in corresponding years | GD overall: 0.32/100,000 children<br>GD1: 0.26/100,000 children‡<br>GD2: 0.02/100,000 children‡<br>GD3: 0.04/100,000 children‡ |

| Italy                        |                 |                   |                                                     |                                                                                                                                            |
|------------------------------|-----------------|-------------------|-----------------------------------------------------|--------------------------------------------------------------------------------------------------------------------------------------------|
| Žnidar et al.<br>2014 [20]   | Cross-sectional | Jun 2012–Apr 2013 | Italian<br>population in<br>2013                    | GD (unspecified):<br>0.4/100,000 inhabitants*                                                                                              |
| Romania                      |                 |                   |                                                     |                                                                                                                                            |
| Bucerzan et al.<br>2017 [42] | Cross-sectional | 2017 <sup>†</sup> | Romanian<br>population in<br>corresponding<br>years | GD (overall):<br>0.4/100,000 inhabitants<br>GD1:<br>0.38/100,000 inhabitants <sup>‡</sup><br>GD3:<br>0.02/100,000 inhabitants <sup>‡</sup> |
| Germany                      |                 |                   |                                                     |                                                                                                                                            |
| Žnidar et al.<br>2014 [20]   | Cross-sectional | Jun 2012–Apr 2013 | German<br>population in<br>2013                     | GD (unspecified):<br>0.42/100,000 inhabitants*                                                                                             |
| UK                           |                 |                   |                                                     |                                                                                                                                            |
| Gauchers<br>Association [47] | Society report  | 2016 <sup>†</sup> | UK population<br>in 2016                            | GD (unspecified):<br>0.47/100,000 inhabitants                                                                                              |
| Serbia                       |                 |                   |                                                     |                                                                                                                                            |
| Žnidar et al.<br>2014 [20]   | Cross-sectional | Jun 2012–Apr 2013 | Serbian<br>population in<br>2013                    | GD (unspecified):<br>0.5/100,000 inhabitants*                                                                                              |
| Macedonia                    |                 |                   |                                                     |                                                                                                                                            |
| Žnidar et al.<br>2014 [20]   | Cross-sectional | Jun 2012–Apr 2013 | Macedonian<br>population in<br>2013                 | GD (unspecified):<br>0.58/100,000 inhabitants*                                                                                             |
| Sweden                       |                 |                   |                                                     |                                                                                                                                            |
| Žnidar et al.<br>2014 [20]   | Cross-sectional | Jun 2012–Apr 2013 | Swedish<br>population in<br>2013                    | GD (unspecified):<br>0.58/100,000 inhabitants*                                                                                             |
| Iberian Peninsular           |                 |                   |                                                     |                                                                                                                                            |
| Giraldo et al.<br>2012 [44]  | Cross-sectional | 2012 <sup>†</sup> | Total number<br>of inhabitants                      | GD (overall):<br>0.67/100,000 inhabitants                                                                                                  |

|                         |                                         |                   |                                                 |                                             |
|-------------------------|-----------------------------------------|-------------------|-------------------------------------------------|---------------------------------------------|
|                         |                                         |                   | in the Iberian Peninsula in corresponding years |                                             |
| Greece                  |                                         |                   |                                                 |                                             |
| Žnidar et al. 2014 [20] | Cross-sectional                         | Jun 2012–Apr 2013 | Greek population in 2013                        | GD (unspecified): 0.73/100,000 inhabitants* |
| France                  |                                         |                   |                                                 |                                             |
|                         |                                         |                   |                                                 | GD (overall): 0.74/100,000 inhabitants      |
|                         |                                         |                   |                                                 | GD1: 0.63/100,000 inhabitants‡              |
|                         |                                         |                   |                                                 | GD2: 0.08/100,000 inhabitants‡              |
|                         |                                         |                   |                                                 | GD3: 0.03/100,000 inhabitants‡              |
| Slovenia                |                                         |                   |                                                 |                                             |
| Žnidar et al. 2014 [20] | Cross-sectional                         | Jun 2012–Apr 2013 | Slovenian population in 2013                    | GD (unspecified): 0.92/100,000 inhabitants* |
| Spain                   |                                         |                   |                                                 |                                             |
| Žnidar et al. 2014 [20] | Cross-sectional                         | Jun 2012–Apr 2013 | Spanish population in 2013                      | GD (unspecified): 0.64/100,000 inhabitants* |
| SEHH 2020 [36]          | Newsletter from the Spanish GD registry | 2020†             | Spanish population                              | GD (unspecified): 1.1/100,000 inhabitants   |

GD unspecified refers to absence of any mention of whether study targeted GD overall or a given type

\*Estimates were calculated using the size of the country population.

†Year of publication.

‡Estimates were calculated using the reported prevalence and distribution of GD types.

**Supplemental Table S2.** GD prevalence: North America.

|                     | Study Design                                                              | Study Period      | Reference Population                                                                                       | Prevalence                                                                                            |
|---------------------|---------------------------------------------------------------------------|-------------------|------------------------------------------------------------------------------------------------------------|-------------------------------------------------------------------------------------------------------|
| Canada              |                                                                           |                   |                                                                                                            |                                                                                                       |
| INESSS 2018 [49]    | (INESS, public drug payer of Quebec Province) Cerdelga® notice of refusal | 2017              | Quebec population in 2017                                                                                  | GD (unspecified): ~0.60/100,000 inhabitants*                                                          |
| Yu et al. 2018 [41] | Retrospective cohort                                                      | Jan 1996–Aug 2016 | Adult Ontario population in 2016                                                                           | GD (overall):<br>Adults in Ontario: 0.64/100,000<br>Ashkenazi Jewish adults in Ontario: 10.15/100,000 |
| USA                 |                                                                           |                   |                                                                                                            |                                                                                                       |
| NORD 2013 [48]      | Physician's Guide to Gaucher Disease from NORD                            | 2013 <sup>†</sup> | US population in 2013                                                                                      | GD (unspecified): ~1.93/100,000 inhabitants*                                                          |
| Grinzaid 2017 [38]  | Prospective cohort                                                        | 2013–2017         | Ashkenazi Jewish students participating in an at-home national Jewish genetic disease screening initiative | GD (unspecified): 139/100,000 Ashkenazi Jewish population                                             |

GD unspecified refers to absence of any mention of whether study targeted GD overall or a given type

\*Estimates were calculated using the size of the country population.

<sup>†</sup>Year of publication.

Table S3. PRISMA checklist

| Section/topic             | #  | Checklist item                                                                                                                                                                                                                                                                                              | Reported on page #            |
|---------------------------|----|-------------------------------------------------------------------------------------------------------------------------------------------------------------------------------------------------------------------------------------------------------------------------------------------------------------|-------------------------------|
| TITLE                     |    |                                                                                                                                                                                                                                                                                                             |                               |
| Title                     | 1  | Identify the report as a systematic review, meta-analysis, or both.                                                                                                                                                                                                                                         | 1                             |
| ABSTRACT                  |    |                                                                                                                                                                                                                                                                                                             |                               |
| Structured summary        | 2  | Provide a structured summary including, as applicable: background; objectives; data sources; study eligibility criteria, participants, and interventions; study appraisal and synthesis methods; results; limitations; conclusions and implications of key findings; systematic review registration number. | 1, no reg. # for SLR          |
| INTRODUCTION              |    |                                                                                                                                                                                                                                                                                                             |                               |
| Rationale                 | 3  | Describe the rationale for the review in the context of what is already known.                                                                                                                                                                                                                              | 1-2                           |
| Objectives                | 4  | Provide an explicit statement of questions being addressed with reference to participants, interventions, comparisons, outcomes, and study design (PICOS).                                                                                                                                                  | 2-3                           |
| METHODS                   |    |                                                                                                                                                                                                                                                                                                             |                               |
| Protocol and registration | 5  | Indicate if a review protocol exists, if and where it can be accessed (e.g., Web address), and, if available, provide registration information including registration number.                                                                                                                               | Protocol available on request |
| Eligibility criteria      | 6  | Specify study characteristics (e.g., PICOS, length of follow-up) and report characteristics (e.g., years considered, language, publication status) used as criteria for eligibility, giving rationale.                                                                                                      | 2-3<br>Tables 1 and 2         |
| Information sources       | 7  | Describe all information sources (e.g., databases with dates of coverage, contact with study authors to identify additional studies) in the search and date last searched.                                                                                                                                  | 2-4                           |
| Search                    | 8  | Present full electronic search strategy for at least one database, including any limits used, such that it could be repeated.                                                                                                                                                                               | 2-4                           |
| Study selection           | 9  | State the process for selecting studies (i.e., screening, eligibility, included in systematic review, and, if applicable, included in the meta-analysis).                                                                                                                                                   | 2-3<br>Tables 1 and 2         |
| Data collection process   | 10 | Describe method of data extraction from reports (e.g., piloted forms, independently, in duplicate) and any processes for obtaining and confirming data from investigators.                                                                                                                                  | 2-4                           |
| Data items                | 11 | List and define all variables for which data were sought (e.g., PICOS, funding sources) and any assumptions and simplifications made.                                                                                                                                                                       | 2-4                           |

|                                    |    |                                                                                                                                                                                                                        |                                                                             |
|------------------------------------|----|------------------------------------------------------------------------------------------------------------------------------------------------------------------------------------------------------------------------|-----------------------------------------------------------------------------|
| Risk of bias in individual studies | 12 | Describe methods used for assessing risk of bias of individual studies (including specification of whether this was done at the study or outcome level), and how this information is to be used in any data synthesis. | 2-4                                                                         |
| Summary measures                   | 13 | State the principal summary measures (e.g., risk ratio, difference in means).                                                                                                                                          | 2-4                                                                         |
| Synthesis of results               | 14 | Describe the methods of handling data and combining results of studies, if done, including measures of consistency (e.g., $I^2$ ) for each meta-analysis.                                                              | 2-4                                                                         |
| Risk of bias across studies        | 15 | Specify any assessment of risk of bias that may affect the cumulative evidence (e.g., publication bias, selective reporting within studies).                                                                           | NA                                                                          |
| Additional analyses                | 16 | Describe methods of additional analyses (e.g., sensitivity or subgroup analyses, meta-regression), if done, indicating which were pre-specified.                                                                       | NA                                                                          |
| RESULTS                            |    |                                                                                                                                                                                                                        |                                                                             |
| Study selection                    | 17 | Give numbers of studies screened, assessed for eligibility, and included in the review, with reasons for exclusions at each stage, ideally with a flow diagram.                                                        | Figure 1                                                                    |
| Study characteristics              | 18 | For each study, present characteristics for which data were extracted (e.g., study size, PICOS, follow-up period) and provide the citations.                                                                           | 5-12<br>Tables 3–5 and<br>Figure 3 and 5<br>Supplementary<br>Tables 1 and 2 |
| Risk of bias within studies        | 19 | Present data on risk of bias of each study and, if available, any outcome level assessment (see item 12).                                                                                                              | NA                                                                          |
| Results of individual studies      | 20 | For all outcomes considered (benefits or harms), present, for each study: (a) simple summary data for each intervention group (b) effect estimates and confidence intervals, ideally with a forest plot.               | NA                                                                          |
| Synthesis of results               | 21 | Present results of each meta-analysis done, including confidence intervals and measures of consistency.                                                                                                                | NA                                                                          |
| Risk of bias across studies        | 22 | Present results of any assessment of risk of bias across studies (see Item 15).                                                                                                                                        | NA                                                                          |
| Additional analysis                | 23 | Give results of additional analyses, if done (e.g., sensitivity or subgroup analyses, meta-regression [see Item 16]).                                                                                                  | NA                                                                          |
| DISCUSSION                         |    |                                                                                                                                                                                                                        |                                                                             |
| Summary of evidence                | 24 | Summarize the main findings including the strength of evidence for each main outcome; consider their relevance to key groups (e.g., healthcare providers, users, and policy makers).                                   | 13-16                                                                       |

|             |    |                                                                                                                                                               |       |
|-------------|----|---------------------------------------------------------------------------------------------------------------------------------------------------------------|-------|
| Limitations | 25 | Discuss limitations at study and outcome level (e.g., risk of bias), and at review-level (e.g., incomplete retrieval of identified research, reporting bias). | 17-18 |
| Conclusions | 26 | Provide a general interpretation of the results in the context of other evidence, and implications for future research.                                       | 19    |
| FUNDING     |    |                                                                                                                                                               |       |
| Funding     | 27 | Describe sources of funding for the systematic review and other support (e.g., supply of data); role of funders for the systematic review.                    | 19    |
